# Supplementary material
Source: HighWire-hosted journal article supplement (https://openres.ersjournals.com/content/9/3/00004-2023)
Supplement: inline-supplementary-material-1 [file inline-supplementary-material-1.pdf]

## **Computed tomography measure of lung injury and future interstitial features: The CARDIA Lung Study**

AUTHORS: Gabrielle Y. Liu, Laura A. Colangelo, Samuel Y. Ash , Raul San Jose Estepar, David R. Jacobs, Jr, Bharat Thyagarajan, J Michael Wells, Rachel K. Putman, Bina Choi, Christopher S. Stevenson, Mercedes Carnethon, George R. Washko, Ravi Kalhan

### ONLINE DATA SUPPLEMENT

#### **Supplemental Methods:**

##### *CT Acquisition*

Year 15 (mean age 40): Computed tomography scans were obtained at the year 15 CARDIA examination using the following scanners at each field center: GE Lightspeed QX/I (Birmingham), Imatron C-150 (Chicago, Oakland), Siemens S4+Volume Zoom (Minneapolis). All scans were performed with a single breath hold with images taken at end-inspiration. The following image acquisition protocols were used: 130 kVp, 630 mA, 100 msec scan time, 3mm collimation, sharp reconstruction filter with 35 cm field of view and sharp reconstruction kernel (Imatron C-150); 120 kVp, 200 mA, 800 ms scan, 4x2.5mm collimation, sequential axial scans, segmented reconstruction, standard filter with a 35 cm field of view and standard kernel reconstruction (GE Lightspeed QX/I); 140 kVp, 100 mA, 500 ms scan, 4 x2.5mm collimation, sequential axial scans with 35 cm field of view and standard filter reconstruction (Siemens S4+ Volume Zoom).

Year 25 (mean age 50): Computed tomography scans were obtained at the year 25 CARDIA examination using the following scanners at each field center: GE Discovery CT750 (Birmingham), Siemens Sensation 64 (Chicago, Minneapolis), GE Lightspeed VCT 64 (Oakland). All were 64+ channel multi-detector computed tomography scanners. All scans utilized a single breath hold with images taken at end-inspiration with thorax scanned from

posterior lung recesses to the lung apex. The following image acquisition protocols were used: 100 kVp, 130 mAs, prospective ECG gating at 75%, 0.625 mm x 64 slices (64i mode GE, or equivalent on Siemens, Philips or Toshiba), 0.33 second gantry, CINE, snapshot pulse/prospective triggering. Standard reconstruction: 35 cm DFOV, 2.5-3 mm slice thickness. High Resolutions reconstruction: 25 cm DFOV, 0.5-0.6 mm slice thickness. Third reconstruction: 50 cm DFOV, 0.5-0.6 mm.

**Supplemental Figures and Tables:**

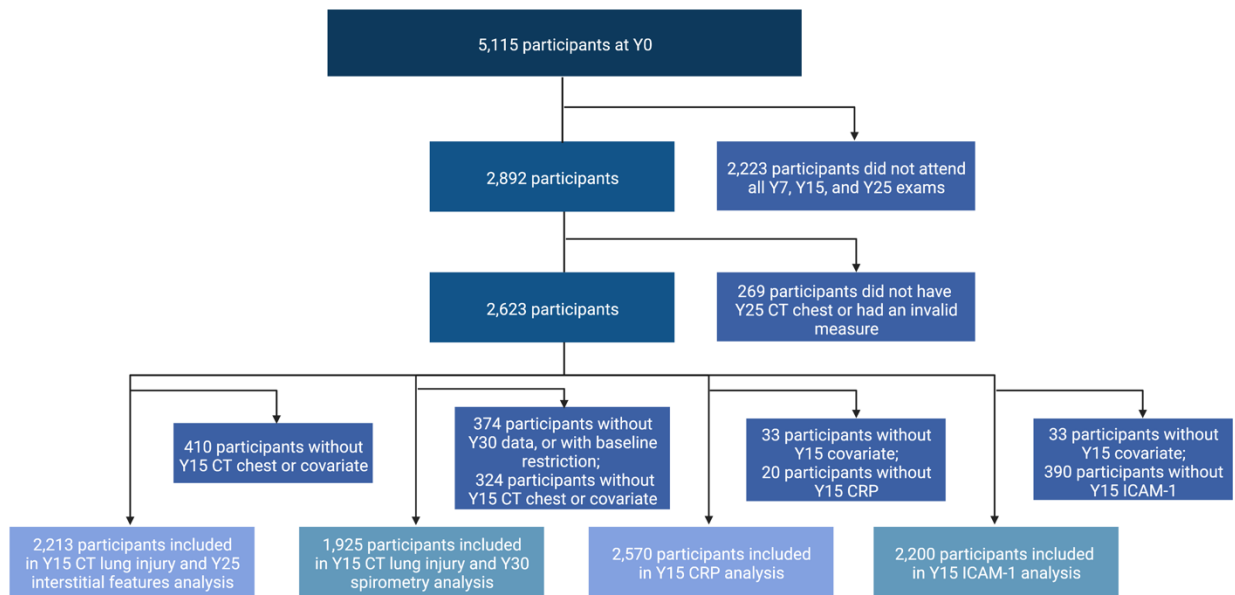

**Supplementary Figure S1.** Numbers of participants included in the primary analyses and Table 3 based on the availability of Year 7 (mean age 32), Year 15 (mean age 40), Year 25 (mean age 50), Year 30 (mean age 55) clinical data, laboratory data, CT scans, and spirometry. *Figure created with BioRender.com.*

**Supplementary Table 1.** Association between inflammatory markers at mean age 32 (year 7) and CT features at mean age 50 (year 25)

|                                           | Median (IQR) percentage of lung characterized as CT feature, by quartile of inflammatory marker* |                       |                       |                        | Associated percent increase (95% CI) in lung characterized as each CT feature, per 10% increase in inflammatory marker† |
|-------------------------------------------|--------------------------------------------------------------------------------------------------|-----------------------|-----------------------|------------------------|-------------------------------------------------------------------------------------------------------------------------|
|                                           | Quartile of Year 7 CRP                                                                           |                       |                       |                        |                                                                                                                         |
|                                           | Q1                                                                                               | Q2                    | Q3                    | Q4                     |                                                                                                                         |
| <b>CRP mean (SD) in µg/mL</b>             | 0.29 (0.11)                                                                                      | 0.75 (0.17)           | 1.88 (0.56)           | 8.04 (7.64)            |                                                                                                                         |
| <b>CT lung injury‡</b><br>(N=2484)        | 0.59%<br>(0.10-3.55%)                                                                            | 0.95%<br>(0.15-5.75%) | 1.37%<br>(0.26-7.27%) | 2.33%<br>(0.40-15.24%) | 0.64% (-0.08 – 1.37%)                                                                                                   |
| <b>Interstitial features§</b><br>(N=2484) | 0.50%<br>(0.15-1.61%)                                                                            | 0.66%<br>(0.23-2.34%) | 0.80%<br>(0.28-2.63%) | 1.27%<br>(0.37-4.06%)  | 0.51% (-0.08 – 1.11%)                                                                                                   |
|                                           | Quartile of Year 7 ICAM-1                                                                        |                       |                       |                        |                                                                                                                         |
|                                           | Q1                                                                                               | Q2                    | Q3                    | Q4                     |                                                                                                                         |
| <b>ICAM-1 mean (SD) in ng/L</b>           | 105.9 (10.2)                                                                                     | 127.6 (4.9)           | 144.8 (5.1)           | 179.1 (29.4)           |                                                                                                                         |
| <b>CT lung injury</b><br>(N=1649)         | 0.52%<br>(0.09-3.27%)                                                                            | 0.78%<br>(0.15-5.35%) | 1.37%<br>(0.22-8.18%) | 1.89%<br>(0.35-12.02%) | 5.30% (-0.20 – 11.1%)                                                                                                   |
| <b>Interstitial features</b><br>(N=1649)  | 0.43%<br>(0.14-1.55%)                                                                            | 0.67%<br>(0.20-2.10%) | 0.81%<br>(0.25-2.58%) | 1.09%<br>(0.37-3.53%)  | 2.04% (-2.33 – 6.60%)                                                                                                   |

\*Unadjusted

†Based on multivariable linear regression, after log-transformation of inflammatory marker and log-transformation of CT feature. Covariates: center, age, race, sex, educational attainment, BMI, smoking status, cigarettes smoked per day, smoking pack-years.

Models adjusted for year 0 field center, age, race, and sex, and year 7 years of education, smoking status, cigarettes smoked per day, BMI, year 25-year 7 BMI change, and year 25 smoking pack-years.

‡CT lung injury feature defined as visually normal-appearing regions with attenuation >90th percentile for normal lung tissue.

§Interstitial features defined as reticular, centrilobular nodule, linear scar, nodular, subpleural line, ground glass, and honeycombing

CT=computed tomography. IQR=interquartile range. CRP=C-reactive protein. ICAM=intercellular adhesion molecule. SD=standard deviation.
